# Supplementary material
Source: PubMed Central journal article supplement (PMC2951125)
Supplement: NIHMS238696-supplement-data_table.pdf [file NIHMS238696-supplement-data_table.pdf]

# *Drugs & Aging*

## **Differences in Medication Use in the Alzheimer's Disease Neuroimaging Initiative Analysis of Baseline Characteristics**

*Epstein NU, et al.*

### **Supplemental Digital Content**

This Supplemental Digital Content contains the tables referred to in the full version of this article, which can be found at <http://adisonline.com/aging>.

© 2010 Adis Data Information BV. All rights reserved.

# Table S1: Independent variables and cholinesterase inhibitor treatment status in MCI and AD

| Independent Variable                   | MCI (n=400) |      |             |     |         | AD (n=184) |     |             |     |         |
|----------------------------------------|-------------|------|-------------|-----|---------|------------|-----|-------------|-----|---------|
|                                        | No (n=221)  |      | Yes (n=179) |     | P-value | No (n=25)  |     | Yes (n=159) |     | P-value |
|                                        | Mean        | Sd   | Mean        | Sd  |         | Mean       | Sd  | Mean        | Sd  |         |
| Baseline age                           | 75.4        | 7.4  | 74.1        | 7.3 | 0.0862  | 76.2       | 7.2 | 75.3        | 7.6 | 0.6062  |
| Female (%)                             | 35.7        |      | 35.8        |     | 0.9987  | 76.0       |     | 43.4        |     | 0.0024  |
| Years of education                     | 15.6        | 3.1  | 15.8        | 2.9 | 0.4974  | 13.2       | 3.5 | 14.9        | 3.0 | 0.0098  |
| RAVLT                                  | 32.0        | 10.1 | 29.0        | 7.2 | 0.0006  | 23.6       | 8.1 | 23.4        | 7.3 | 0.8748  |
| LET (mm)                               | 3.0         | 0.5  | 2.9         | 0.5 | 0.0056  | 2.7        | 0.4 | 2.6         | 0.5 | 0.6254  |
| LHV*10 <sup>3</sup> (mm <sup>3</sup> ) | 3.1         | 0.5  | 3.0         | 0.5 | 0.0115  | 2.5        | 0.5 | 2.7         | 0.5 | 0.0837  |
| ICV*10 <sup>5</sup> (mm <sup>3</sup> ) | 16.1        | 2.0  | 16.2        | 2.0 | 0.5576  | 15.1       | 1.9 | 16.1        | 2.4 | 0.0415  |
| CDR-SB                                 | 1.5         | 0.8  | 1.8         | 1.0 | 0.0001  | 4.0        | 1.8 | 4.4         | 1.6 | 0.2600  |

Mild cognitive impairment (MCI), Alzheimer's disease (AD), Rey Auditory Verbal Learning Test (RAVLT), left entorhinal cortex (LET), left hippocampal volume (LHV), intracranial volume (ICV) and Clinical Dementia Rating sum of boxes (CDR-SB).

# Table S2: Independent variables and memantine treatment status in MCI and AD

| Independent Variable                   | MCI (n=400) |     |             |     |         | AD (n=184) |     |             |     |         |
|----------------------------------------|-------------|-----|-------------|-----|---------|------------|-----|-------------|-----|---------|
|                                        | No (n=221)  |     | Yes (n=179) |     | P-value | No (n=25)  |     | Yes (n=159) |     | P-value |
|                                        | Mean        | Sd  | Mean        | Sd  |         | Mean       | Sd  | Mean        | Sd  |         |
| Baseline age                           | 75.0        | 7.3 | 73.7        | 7.6 | 0.2684  | 75.7       | 6.6 | 75.1        | 8.5 | 0.6030  |
| Female (%)                             | 37.6        |     | 20.5        |     | 0.0248  | 50.5       |     | 44.7        |     | 0.4324  |
| Years of education                     | 15.5        | 3.0 | 16.7        | 2.8 | 0.0214  | 14.4       | 3.3 | 15.1        | 2.9 | 0.1378  |
| RAVLT                                  | 31.2        | 9.2 | 25.8        | 6.1 | <0.0001 | 24.1       | 7.6 | 22.7        | 7.1 | 0.2192  |
| LET (mm)                               | 3.0         | 0.5 | 2.8         | 0.5 | 0.0128  | 2.6        | 0.4 | 2.7         | 0.5 | 0.7090  |
| LHV*10 <sup>3</sup> (mm <sup>3</sup> ) | 3.0         | 0.5 | 2.9         | 0.5 | 0.0514  | 2.7        | 0.5 | 2.7         | 0.5 | 0.6700  |
| ICV*10 <sup>5</sup> (mm <sup>3</sup> ) | 16.1        | 2.1 | 16.5        | 1.7 | 0.2370  | 15.9       | 2.5 | 16.0        | 2.3 | 0.8571  |
| CDR-SB                                 | 1.6         | 0.8 | 2.0         | 1.0 | 0.0029  | 4.1        | 1.5 | 4.7         | 1.7 | 0.0137  |

Mild cognitive impairment (MCI), Alzheimer's disease (AD), Rey Auditory Verbal Learning Test (RAVLT), left entorhinal cortex (LET), left hippocampal volume (LHV), intracranial volume (ICV) and Clinical Dementia Rating sum of boxes (CDR-SB).
